# Supplementary material for: Electrospun EVOH/AST-120 hybrid nanofiber membranes for removal of indoxyl sulfate from blood
Source: Royal Society of Chemistry journal article supplement (doi:10.1039/d4ra04501g), 2024-01-01
Supplement: d4ra04501g1.pdf [file d4ra04501g1.pdf]

## **Supporting Information**

### **Electrospun EVOH/AST-120 hybrid nanofiber membranes for removal of indoxyl sulfate from blood**

Makoto Sasaki,<sup>ab</sup> Rieko Hirata,<sup>c</sup> Ayano Konagai<sup>c</sup> and Mitsuhiro Ebara<sup>\*ab</sup>

<sup>a</sup> *Research Center for Macromolecules and Biomaterials, National Institute for Materials Science (NIMS), 1-1 Namiki, Tsukuba, Ibaraki, 305-0044, Japan.*

<sup>b</sup> *Graduate School of Pure and Applied Sciences, University of Tsukuba, 1-1-1 Tennodai, Tsukuba, Ibaraki, 305-8577, Japan.*

<sup>c</sup> *Research and Development Division, KUREHA CORPORATION, 16 Ochiai, Nishiki-machi, Iwaki, Fukushima, 974-8686, Japan.*

\*Corresponding author

Mitsuhiro Ebara

E-mail address: [EBARA.Mitsuhiro@nims.go.jp](mailto:EBARA.Mitsuhiro@nims.go.jp)

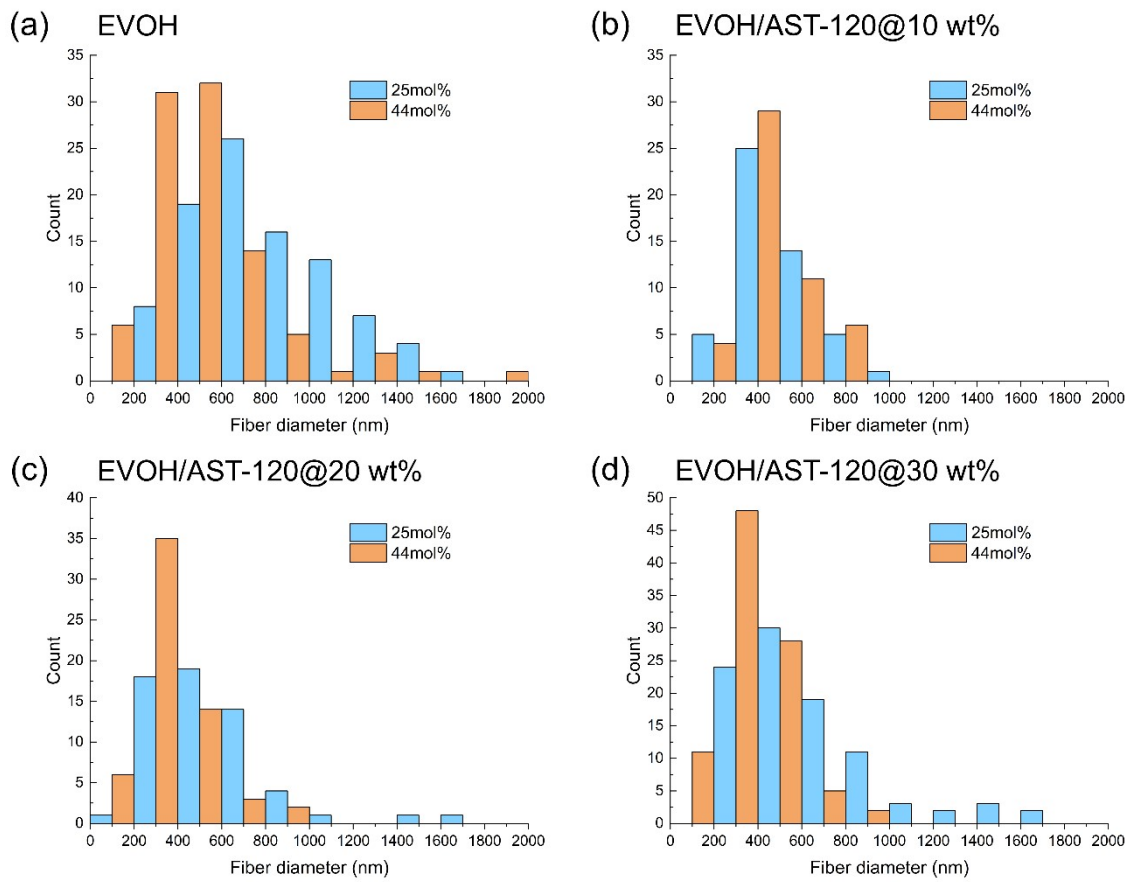

**Fig. S1** Histograms of fiber diameter of the EVOH/AST-120 nanofibers with different ethylene ratios. The containing ratio of AST-120 in nanofibers is (a): 0 wt%, (b) 10 wt%, (c) 20 wt%, and (d) 30 wt%.

**Table S1** The mean value, standard deviation, maximum value, and minimum value of each nanofiber sample.

| Sample                | Mean value<br>(nm) | Std. dev. | Max value<br>(nm) | Min value<br>(nm) |
|-----------------------|--------------------|-----------|-------------------|-------------------|
| EVOH25                | 890                | 230       | 1470              | 460               |
| EVOH25/AST-120@10 wt% | 470                | 170       | 1000              | 220               |
| EVOH25/AST-120@20 wt% | 600                | 390       | 2640              | 140               |
| EVOH25/AST-120@30 wt% | 680                | 330       | 1520              | 240               |
| EVOH44                | 770                | 360       | 1820              | 340               |
| EVOH44/AST-120@10 wt% | 480                | 170       | 860               | 150               |
| EVOH44/AST-120@20 wt% | 360                | 170       | 930               | 150               |
| EVOH44/AST-120@30 wt% | 390                | 170       | 980               | 80                |

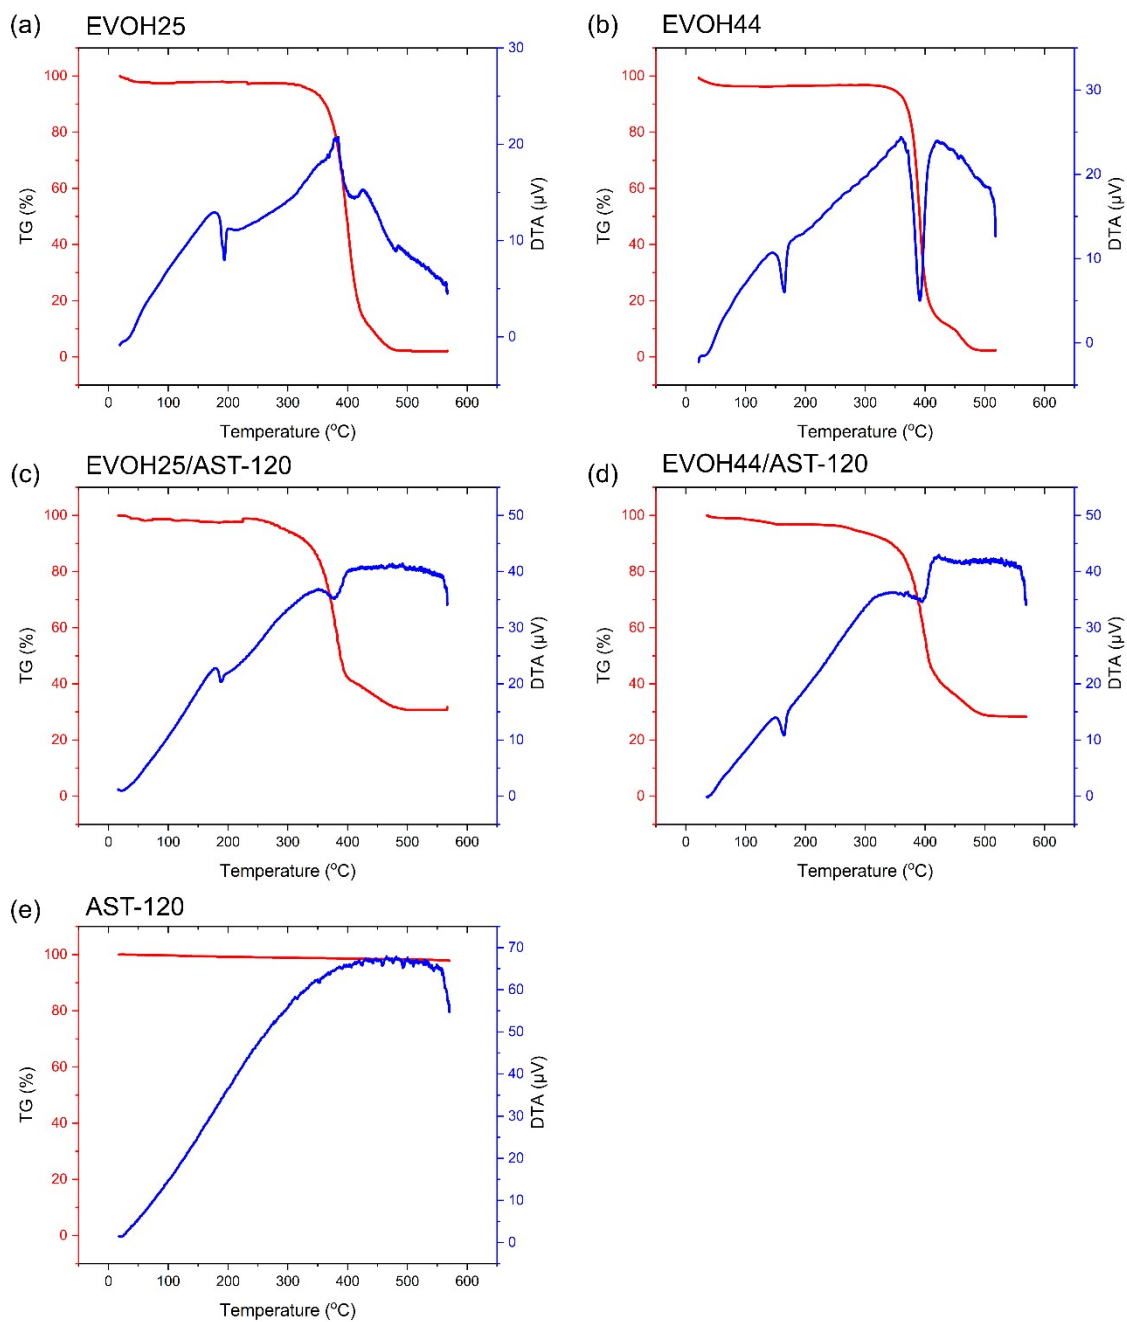

**Fig. S2** TG-DTA curves of (a) EVOH25 nanofibers, (b) EVOH44 nanofibers, (c) EVOH25/AST-120 nanofibers, (d) EVOH44/AST-120 nanofibers, and (e) AST-120 powder.

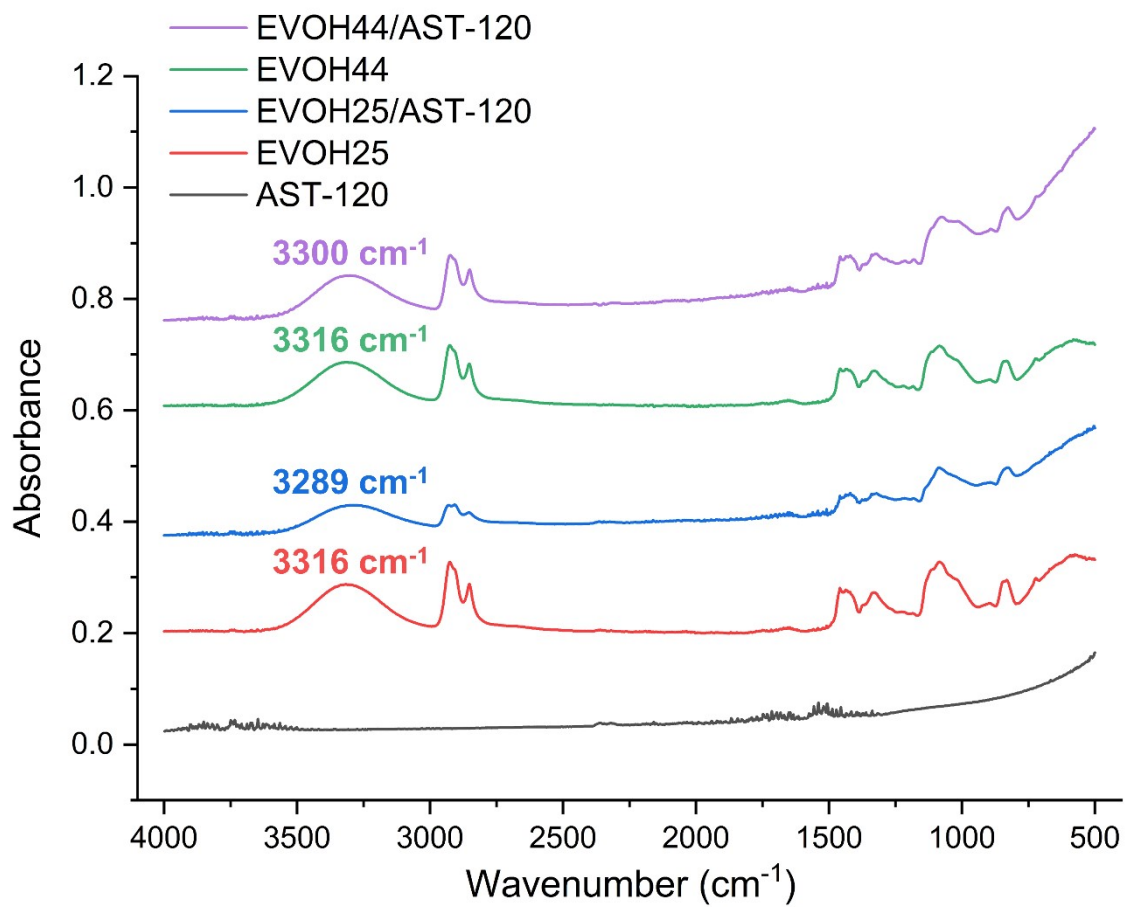

**Fig. S3** FT-IR spectra of AST-120 powder, EVOH nanofibers, and EVOH/AST-120 nanofibers.
